# Supplementary material
Source: publisher site journal article supplement (https://www.dovepress.com/get_supplementary_file.php?f=301064.docx)
Supplement: Supplementary file 1 [file get_supplementary_file.php]

**Supplementary materials**

Supplementary Table 1: Univariate analysis for the characteristics according to depression

| Variables | Non-depression(n=7840) | Depression  (n=1528) | P value |
| --- | --- | --- | --- |
| Age (years) (mean, SD) | 72.4±3.7 | 72.4±5.8 | 0.954 |
| Handgrip strength (kg)  (mean, SD) | 25.3 ± 11.8 | 19.8 ± 10.2 | <0.001 |
| BMI (kg/m2) (mean, SD) | 23.7±3.4 | 22.8±3.7 | <0.001 |
| Low handgrip  strength (n, %) |  |  | <0.001 |
| Yes | 3675(46.9%) | 1036(67.8%) |  |
| No | 4165(53.1%) | 492(32.2%) |  |
| Gender (n, %) |  |  | <0.001 |
| Female | 3177(40.5%) | 758(49.6%) |  |
| Male | 4663(59.5%) | 770(50.4%) |  |
| Education (n, %) |  |  | <0.001 |
| No formal schooling | 1158(14.8%) | 347(22.7%) |  |
| Primary | 2210(28.2%) | 463(30.3%) |  |
| high | 3248(41.4%) | 550(36.0%) |  |
| University | 1222(15.6%) | 168(10.9%) |  |
| Ethnicity (n, %) |  |  | 0.077 |
| Han | 7383(94.2%) | 1421(93.0%) |  |
| Other | 457(5.8%) | 107(7.0%) |  |
| Cancer (n, %) |  |  | 0.898 |
| Yes | 2081(26.5%) | 408(26.7%) |  |
| No | 5759(73.5%) | 1120(73.3%) |  |
| Frailty (n, %) |  |  | <0.001 |
| no | 6884(87.8%) | 875(57.3%) |  |
| Yes | 956(12.2%) | 653(42.7%) |  |
| Cognitive  impairment (n, %) |  |  | <0.001 |
| Yes | 1384(18.3%) | 439(30.2%) |  |
| No | 6188(81.7%) | 1015(69.8%) |  |
| Marital status (n, %) |  |  | 0.0009 |
| Marriage | 6983(89.2%) | 1317(86.3%) |  |
| Wisdom  or divorce | 847(10.8%) | 210(13.7%) |  |
| Drinking (n, %) |  |  | <0.001 |
| Nondrinker | 5920(75.5%) | 1231(80.6%) |  |
| Current drinker | 983(12.5%) | 101(6.6%) |  |
| Former drinker | 937(12.0%) | 19612.8%) |  |
| Smoking (n, %) |  |  | <0.001 |
| Nonsmoker | 5117(65.3%) | 1073(70.2%) |  |
| Current smoker | 911(11.6%) | 118(7.7%) |  |
| Former smoker | 1812(23.1%) | 337(22.1%) |  |
| Fall history in last 12 months (n, %) |  |  | <0.001 |
| Yes | 1014(12.9%) | 294(19.2%) |  |
| No | 6826(87.1%) | 1234(80.8%) |  |
| Vison function (n, %) |  |  | <0.001 |
| Normal | 6313(80.5%) | 1107(72.5%) |  |
| Dysfunction | 1527(19.5%) | 421(27.5%) |  |
| Hearing (n, %) |  |  | <0.001 |
| Dysfunction | 1350(17.2%) | 338(22.1%) |  |
| Normal | 6490(82.8%) | 1190(77.9%) |  |
| Sleeping (n, %) |  |  | <0.001 |
| Dysfunction | 3087(39.4%) | 939(61.5%) |  |
| Normal | 4753(60.6%) | 589(38.5%) |  |
| Urinary function (n, %) |  |  | <0.0001 |
| Dysfunction | 997(12.7%) | 294(19.2%) |  |
| Normal | 6843(87.3%) | 1234(80.8%) |  |
| MNA-SF (n, %) |  |  | <0.001 |
| Normal nutritional (12-14) | 4872(62.2%) | 244(15.9%) |  |
| At risk of malnutrition (8-11) | 2455(31.3%) | 789(51.6%) |  |
| Malnourished (0-7) | 513(6.5%) | 495(32.4%) |  |

**BMI: Body mass index; MNA-SF: Mini Nutritional Assessment**

Supplementary Table 2: The association between handgrip strength and depression by continuous variables or quartiles of relative handgrip strength

| Exposure | Non-adjusted  OR (95%CI) P-value | Adjusted  OR (95%CI) P-value |
| --- | --- | --- |
| Handgrip strength | 0.95（0.94，0.95） | 0.97（0.96，0.98） |
| Quartiles of Handgrip strength |  |  |
| Q1 | 3.96(3.32,4.74) | 2.070（1.65,2.60） |
| Q2 | 2.24(1.86,2.70) | 1.56(1.25,1.94） |
| Q3 | 1.65(1.36,2.00） | 1.36（1.09，1.68） |
| Q4(ref.) | 1.0 | 1.0 |

Adjusted for: Age, gender, education, marital status, BMI, smoking, drinking, hearing, Urinary function, vision, sleeping, frailty, cognitive impairment, and malnutrition.
